# Supplementary material
Source: PubMed Central journal article supplement (PMC8655223)
Supplement: ADVS-8-2103266-s001.pdf [file ADVS-8-2103266-s001.pdf]

# Rapid Detection and Inhibition of SARS-CoV-2-Spike Mutation-Mediated Microthrombosis

S1

## Surface Wall Shear Stress Under Various Flow Rates

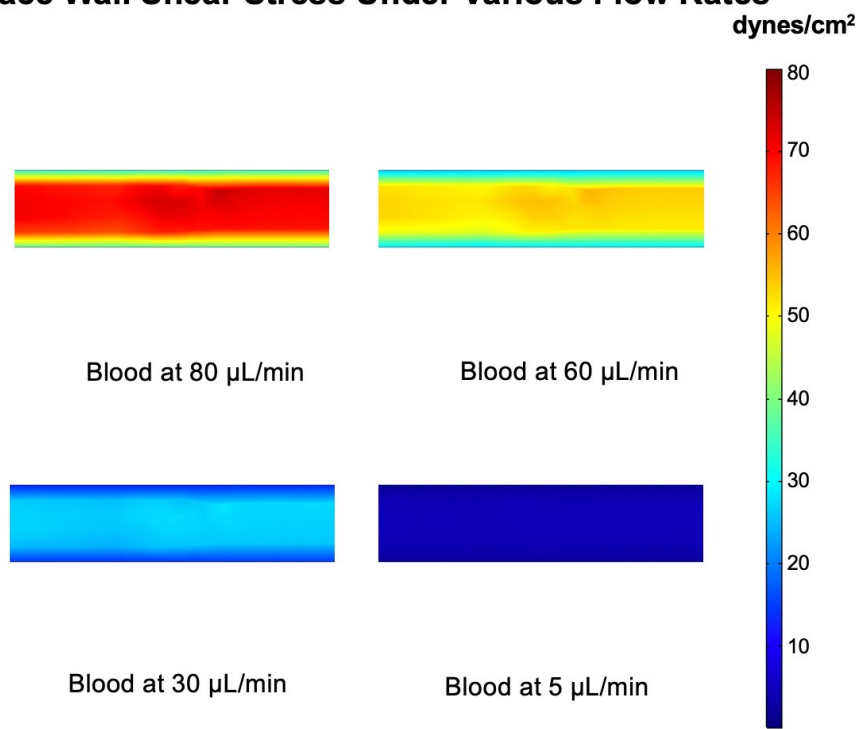

**Figure S1.** Computational fluid dynamic simulations of wall shear stress in the microfluidic channel at varying flow rates was performed in COMSOL to select a flow rate with a wall shear stress of 25 dyne/cm<sup>2</sup>. The simulation with a flow rate of 30  $\mu\text{L}/\text{min}$  provided the desired wall shear stress and was selected for use in the benchtop experiments.

## S2

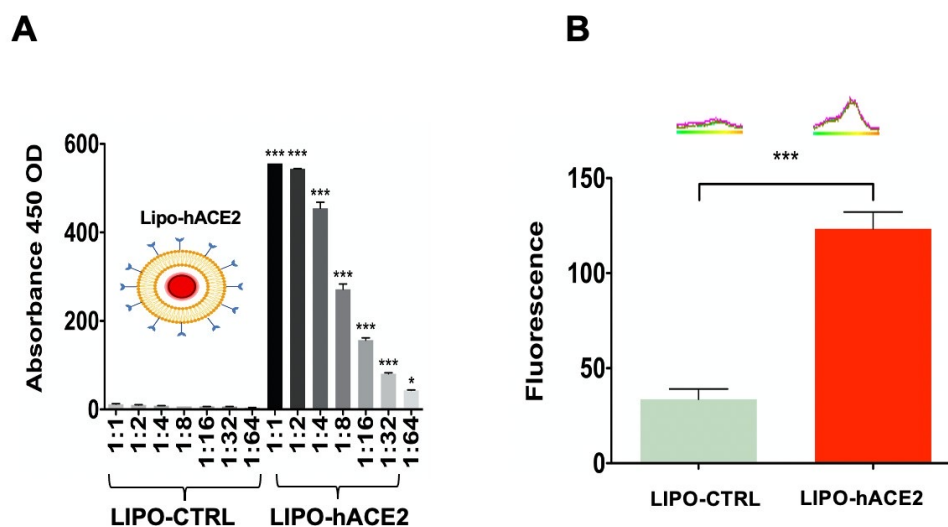

**Figure S2.** (A) Serial dilutions of the Liposome-hACE2 complex were evaluated with indirect ELISA test (absorbance 450 OD) ( $*p < 0.05$  and  $***p < 0.001$  vs. corresponding Lipo-CTRL,  $n = 8$ ). (B) Dilution factor at 1:32 was used to confirm the binding between the liposomes encapsulated with rhodamine and the biotinylated-hACE2 protein (Fluorescence Ex 546 nm and Em 568 nm) ( $***p < 0.001$  vs. Lipo-CTRL,  $n=8$ ).

# S3

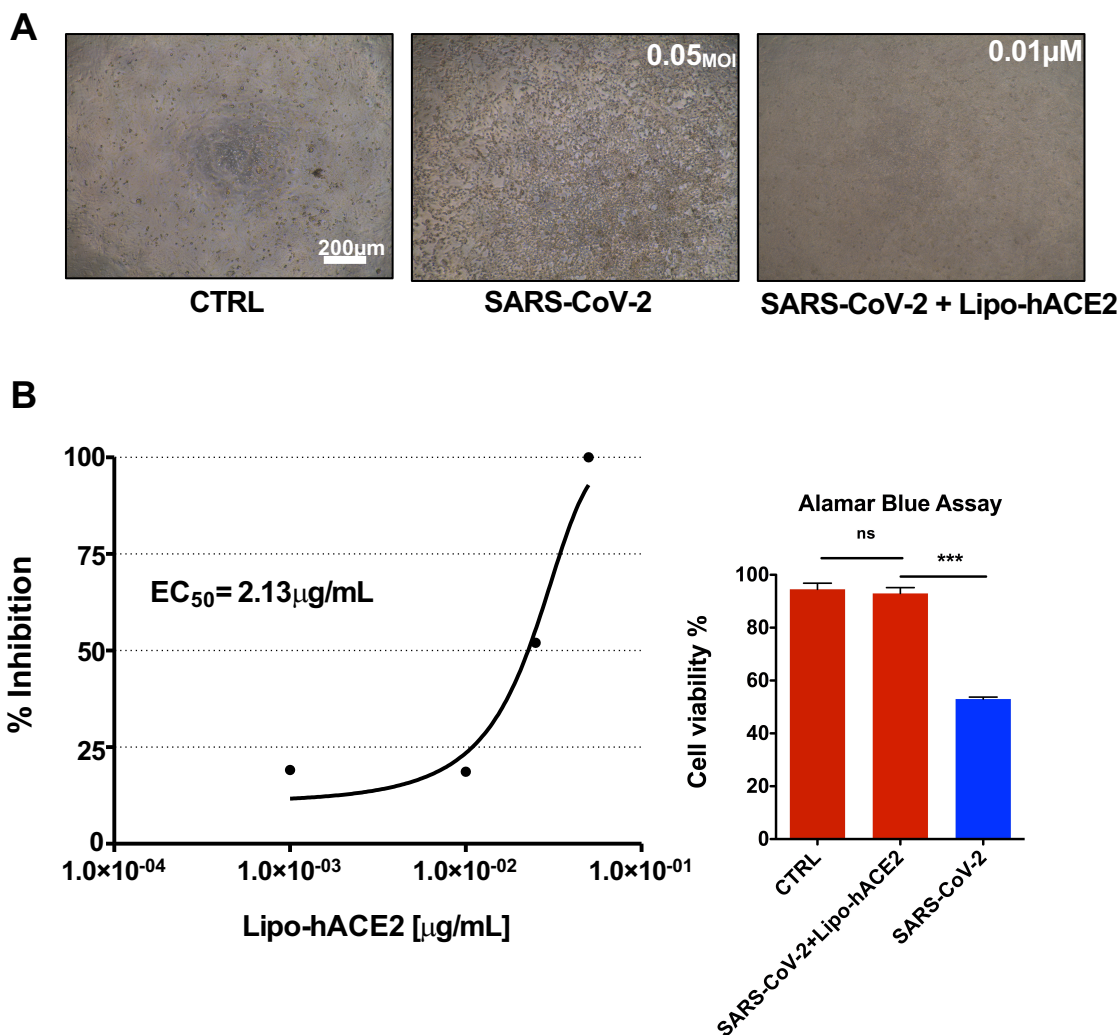

**Figure S3. (A)** Lipo-hACE2 inhibits SARS-CoV-2 binding to the ACE2 receptors, hence, mitigating its cytopathic effects. **(B)** Viral RNA extraction and quantitative real-time RT-PCR was performed to evaluate the SARS-CoV-2 replication by Lipo-hACE2-mediated inhibition. Dose-dependent curve (0.085, 0.085, 2.13, 4.27 $\mu\text{g/mL}$  respectively) showed  $EC_{50} = 2.13 \mu\text{g/mL}$  ( $n=3$ ). Data are presented as median ( $n=3$ ). **(C)** Viability of SARS-CoV-2-infected cells (0.05<sub>MOI</sub>) at 48 hours was measured using Alamar Blue viability assay. Viability was compared to the non-infected control cells (600 nm Absorbance). 0.85  $\mu\text{g/mL}$  of Lipo-hACE2 efficiently inhibited SARS-CoV-2-infected cells ( $***p < 0.001$  CTRL or Lipo-hACE2 + SARS-CoV-2 vs. SARS-CoV-2 only,  $n=5$ ).

A

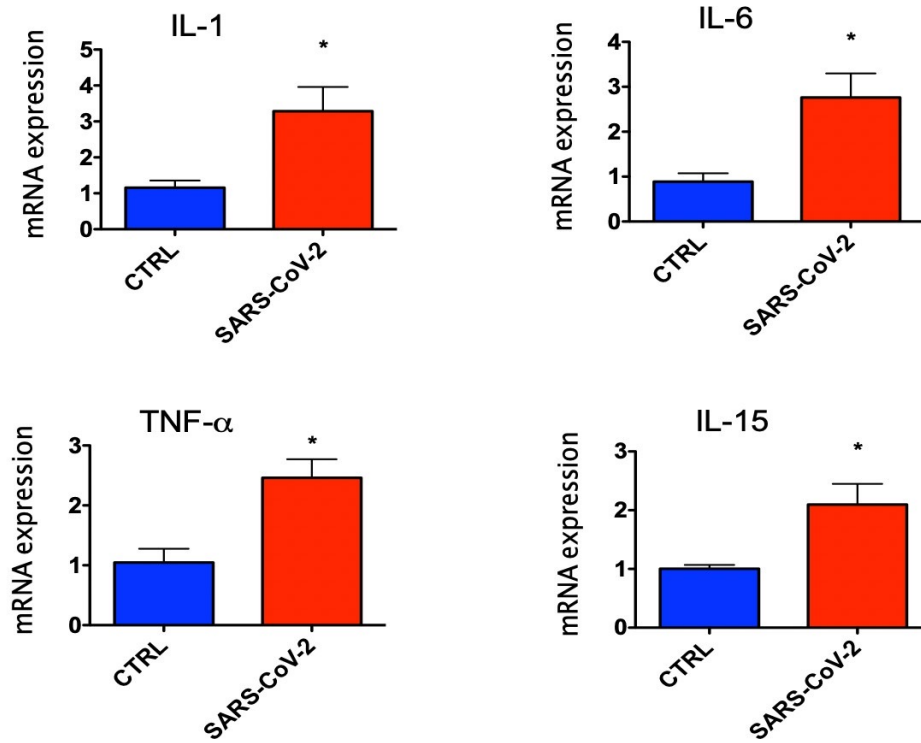

**Figure S4.** SARS-CoV-2-induced cytokine mRNA expression. TNF- $\alpha$ , IL-1, IL-6 and IL-15 were significantly upregulated ( $*p < 0.05$ , *t*-test CTRL vs. SARS-CoV-2 infected cells,  $n=3$ ).

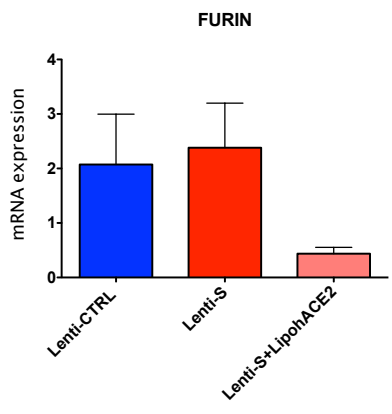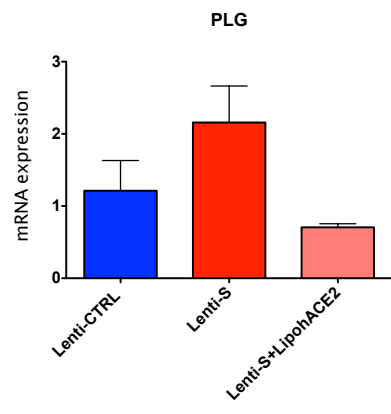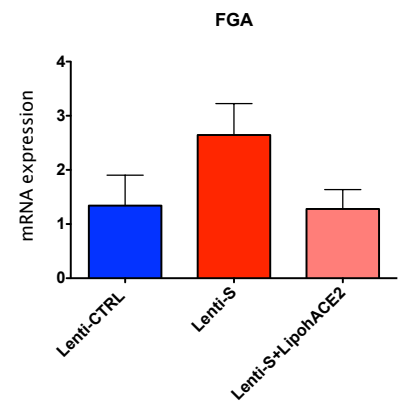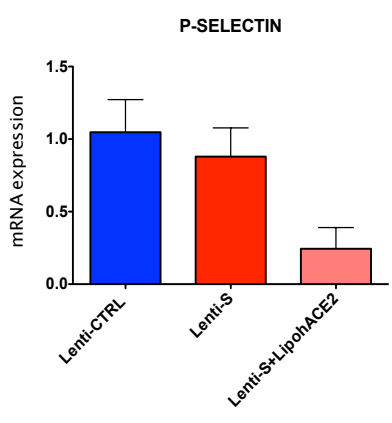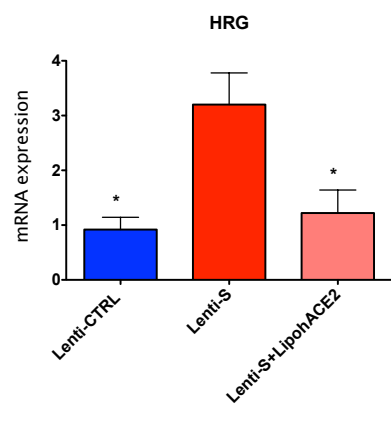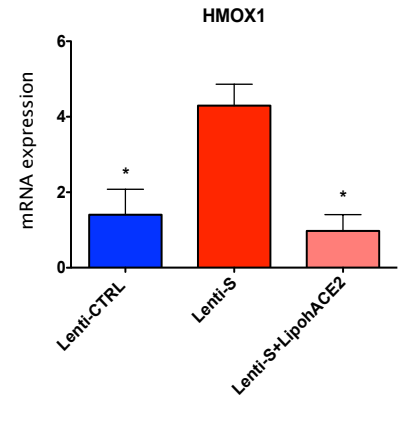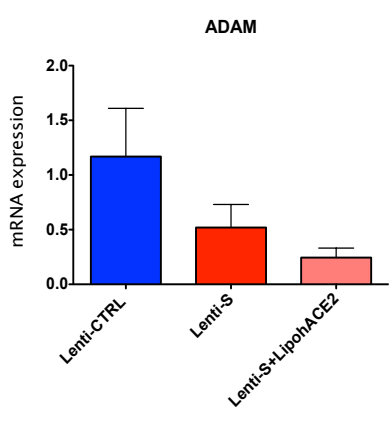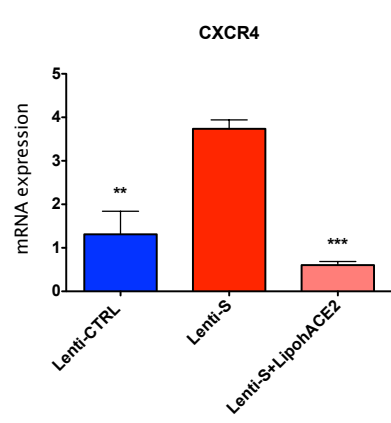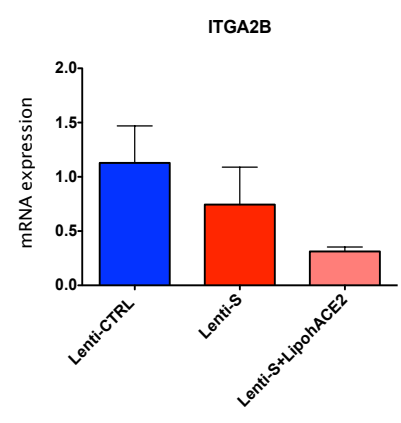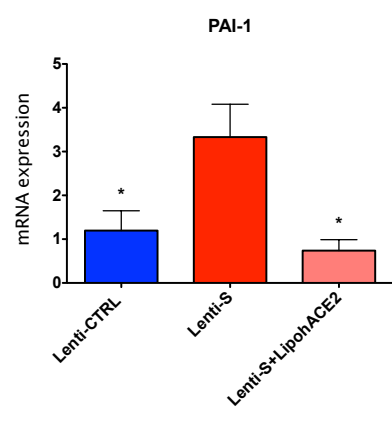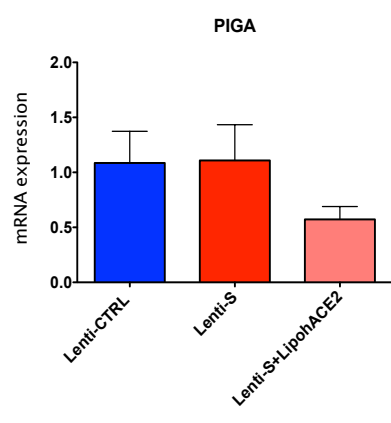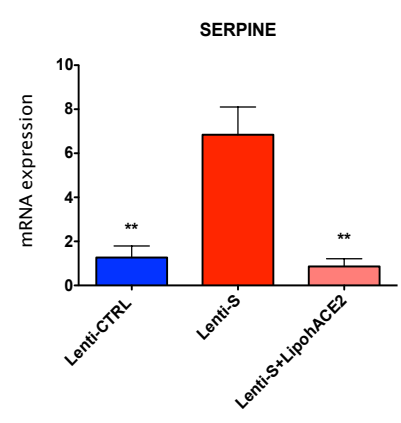

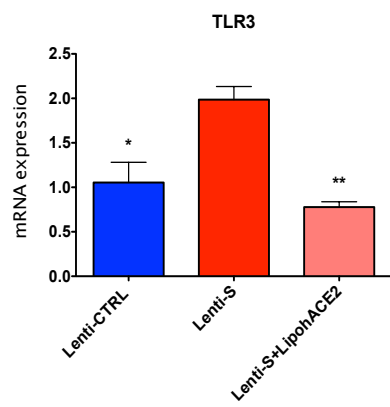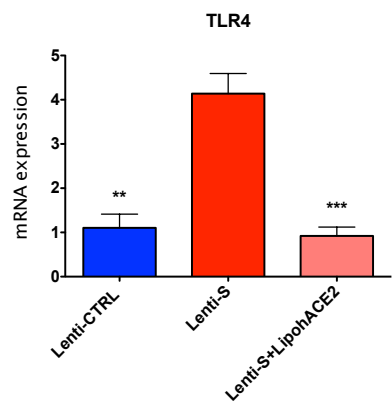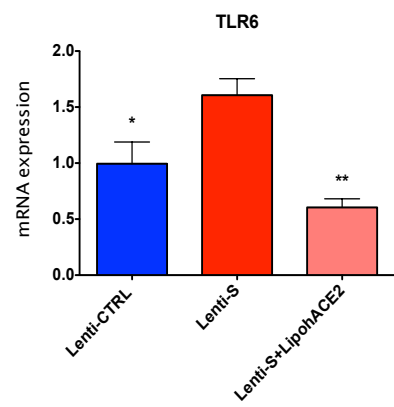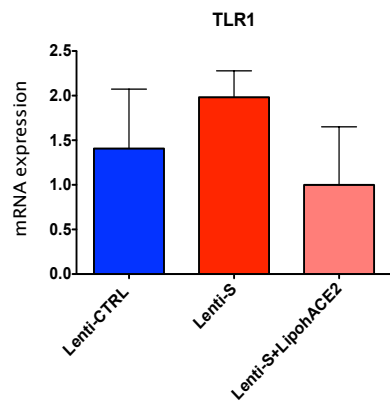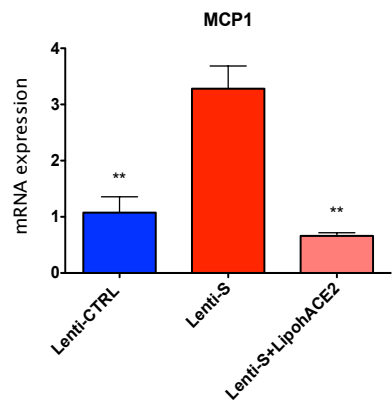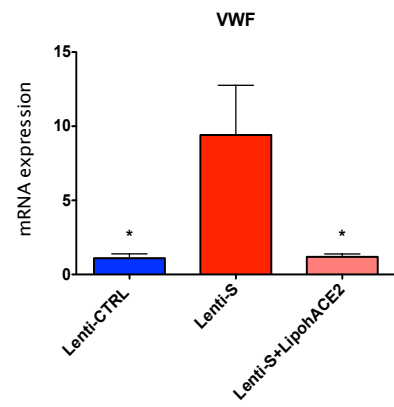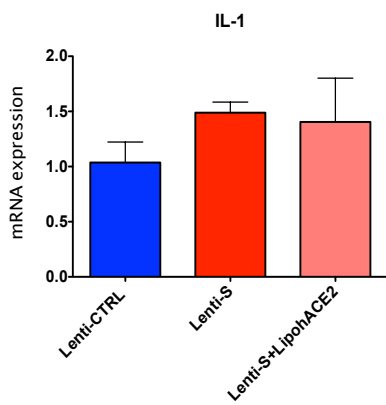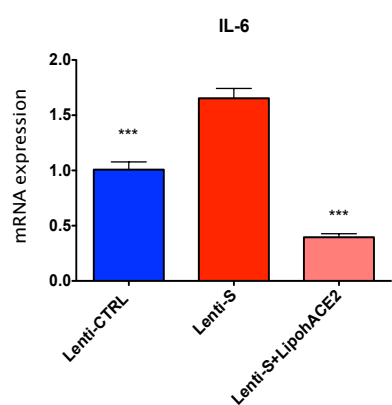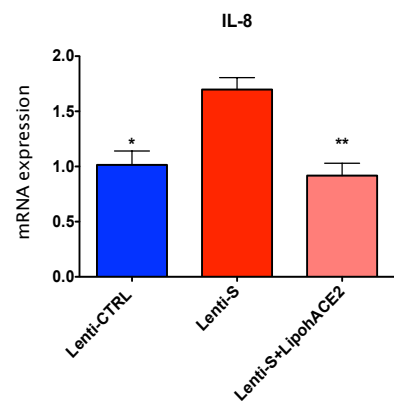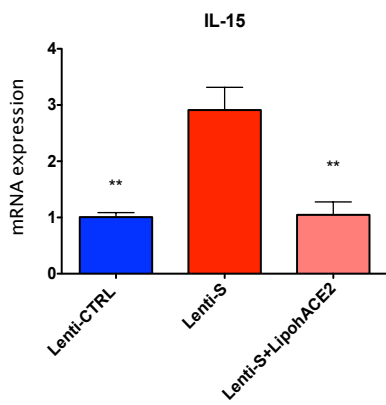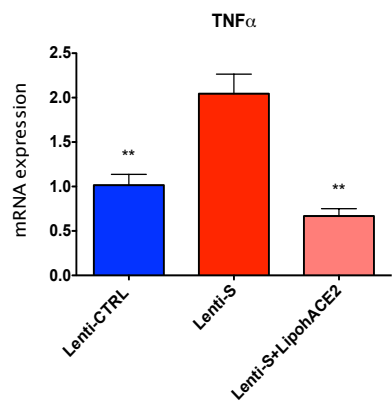

**Figure S5.** Lenti-S mutation D614G upregulated mRNA expression of cytokines, chemokines, and thrombotic genes in HAECs. In the presence Lipo-hACE2, mRNA expression these same cytokines, chemokines, and thrombotic genes were downregulated when compared to the control (\*  $p < 0.05$ , \*\*  $p < 0.01$ , \*\*\*  $p < 0.001$ , Lenti-CTRL and Lenti-S mutation + Lipo-hACE2 vs. Lenti-S mutation,  $n=3$ ).

**Table S1.** Gene ontology (GO) analysis was used to reveal the biological significance of the differentially expressed genes. We demonstrated a gene set enrichment analysis, revealing 3 significantly enriched GO terms ( $p$ -value < 0.01): biological processes, molecular function, and cellular components.

| Pathway                                                                                     | Total | Expected | Hits | PValue   | FDR      |
|---------------------------------------------------------------------------------------------|-------|----------|------|----------|----------|
| Toll-Like Receptors Cascades                                                                | 123   | 5.66     | 51   | 7.16E-37 | 1E-33    |
| Activated TLR4 signalling                                                                   | 100   | 4.6      | 46   | 8.8E-36  | 6.17E-33 |
| Toll Like Receptor 4 (TLR4) Cascade                                                         | 103   | 4.74     | 46   | 4.72E-35 | 2.21E-32 |
| TRIF-mediated TLR3/TLR4 signaling                                                           | 87    | 4        | 38   | 1.4E-28  | 4.92E-26 |
| MyD88-independent cascade                                                                   | 88    | 4.05     | 38   | 2.37E-28 | 5.54E-26 |
| Toll Like Receptor 3 (TLR3) Cascade                                                         | 88    | 4.05     | 38   | 2.37E-28 | 5.54E-26 |
| Immune System                                                                               | 1140  | 52.3     | 130  | 8.25E-27 | 1.65E-24 |
| Signaling by Interleukins                                                                   | 116   | 5.33     | 41   | 2.04E-26 | 3.57E-24 |
| MyD88:Mal cascade initiated on plasma membrane                                              | 81    | 3.72     | 35   | 3.53E-26 | 4.12E-24 |
| Toll Like Receptor TLR6:TLR2 Cascade                                                        | 81    | 3.72     | 35   | 3.53E-26 | 4.12E-24 |
| Innate Immune System                                                                        | 521   | 24       | 82   | 6.16E-25 | 6.65E-23 |
| Toll Like Receptor 10 (TLR10) Cascade                                                       | 74    | 3.4      | 28   | 3.1E-19  | 2.56E-17 |
| Toll Like Receptor 5 (TLR5) Cascade                                                         | 74    | 3.4      | 28   | 3.1E-19  | 2.56E-17 |
| MyD88 cascade initiated on plasma membrane                                                  | 74    | 3.4      | 28   | 3.1E-19  | 2.56E-17 |
| NOD1/2 Signaling Pathway                                                                    | 38    | 1.75     | 21   | 5.93E-19 | 4.62E-17 |
| Platelet degranulation                                                                      | 89    | 4.09     | 30   | 7.3E-19  | 5.38E-17 |
| Response to elevated platelet cytosolic Ca <sup>2+</sup>                                    | 94    | 4.32     | 30   | 4.27E-18 | 2.99E-16 |
| Hemostasis                                                                                  | 511   | 23.5     | 70   | 1.16E-17 | 7.76E-16 |
| Platelet activation, signaling and aggregation                                              | 220   | 10.1     | 44   | 2.45E-17 | 1.56E-15 |
| Nucleotide-binding domain, leucine rich repeat containing receptor (NLR) signaling pathways | 55    | 2.53     | 23   | 3.79E-17 | 2.31E-15 |
| Cytokine Signaling in Immune system                                                         | 286   | 13.1     | 50   | 4.95E-17 | 2.89E-15 |
| TRAF6 mediated induction of NFkB and MAP kinases upon TLR7/8 or 9 activation                | 76    | 3.49     | 26   | 1.14E-16 | 6.4E-15  |
| Toll Like Receptor 7/8 (TLR7/8) Cascade                                                     | 77    | 3.54     | 26   | 1.65E-16 | 8.58E-15 |
| MyD88 dependent cascade initiated on endosome                                               | 77    | 3.54     | 26   | 1.65E-16 | 8.58E-15 |
| Toll Like Receptor 9 (TLR9) Cascade                                                         | 79    | 3.63     | 26   | 3.4E-16  | 1.7E-14  |
| IKK complex recruitment mediated by RIP1                                                    | 25    | 1.15     | 16   | 3.82E-16 | 1.85E-14 |
| TAK1 activates NFkB by phosphorylation and activation of IKKs complex                       | 22    | 1.01     | 15   | 7.92E-16 | 3.7E-14  |
| TRAF6 Mediated Induction of proinflammatory cytokines                                       | 62    | 2.85     | 23   | 9.03E-16 | 4.09E-14 |
| TRAF6 mediated induction of TAK1 complex                                                    | 16    | 0.736    | 13   | 1.59E-15 | 6.95E-14 |
| Activation of IRF3/IRF7 mediated by TBK1/IKK epsilon                                        | 16    | 0.736    | 11   | 5.8E-12  | 2.46E-10 |
| MAP kinase activation in TLR cascade                                                        | 55    | 2.53     | 18   | 1.58E-11 | 6.52E-10 |
| TRIF-mediated programmed cell death                                                         | 11    | 0.506    | 9    | 4.16E-11 | 1.66E-09 |
| activated TAK1 mediates p38 MAPK activation                                                 | 23    | 1.06     | 12   | 6.2E-11  | 2.41E-09 |
| GRB2:SOS provides linkage to MAPK signaling for Integrins                                   | 15    | 0.69     | 10   | 8.95E-11 | 3.39E-09 |
| DAI mediated induction of type I IFNs                                                       | 13    | 0.598    | 9    | 4.98E-10 | 1.84E-08 |
| Chemokine receptors bind chemokines                                                         | 59    | 2.71     | 17   | 5.67E-10 | 2.04E-08 |
| RIG-I/MDA5 mediated induction of IFN-alpha/beta pathways                                    | 67    | 3.08     | 18   | 6.21E-10 | 2.18E-08 |
| Formation of Fibrin Clot (Clotting Cascade)                                                 | 29    | 1.33     | 12   | 1.85E-09 | 6.34E-08 |
| Cytosolic sensors of pathogen-associated DNA                                                | 19    | 0.874    | 10   | 2.34E-09 | 7.79E-08 |
| p130Cas linkage to MAPK signaling for integrins                                             | 15    | 0.69     | 9    | 3.21E-09 | 1.05E-07 |
| JNK (c-Jun kinases) phosphorylation and activation mediated by activated human TAK1         | 20    | 0.92     | 10   | 4.48E-09 | 1.43E-07 |
| Integrin cell surface interactions                                                          | 85    | 3.91     | 19   | 6E-09    | 1.87E-07 |
| Integrin alphaIIb beta3 signaling                                                           | 27    | 1.24     | 11   | 1.1E-08  | 3.34E-07 |
| Platelet Aggregation (Plug Formation)                                                       | 36    | 1.66     | 12   | 3.34E-08 | 9.96E-07 |
| Dissolution of Fibrin Clot                                                                  | 10    | 0.46     | 7    | 4.33E-08 | 1.21E-06 |
| IRAK2 mediated activation of TAK1 complex upon TLR7/8 or 9 stimulation                      | 10    | 0.46     | 7    | 4.33E-08 | 1.21E-06 |
| IRAK2 mediated activation of TAK1 complex                                                   | 10    | 0.46     | 7    | 4.33E-08 | 1.21E-06 |
| TNF signaling                                                                               | 7     | 0.322    | 6    | 6.07E-08 | 1.67E-06 |
| Cell surface interactions at the vascular wall                                              | 99    | 4.55     | 19   | 8.39E-08 | 2.26E-06 |
| RIP-mediated NFkB activation via DAI                                                        | 11    | 0.506    | 7    | 1.14E-07 | 3.02E-06 |
| Downstream TCR signaling                                                                    | 48    | 2.21     | 13   | 1.44E-07 | 3.73E-06 |
| p75NTR signals via NF-kB                                                                    | 16    | 0.736    | 8    | 1.7E-07  | 4.26E-06 |
| TRAF6 mediated NF-kB activation                                                             | 16    | 0.736    | 8    | 1.7E-07  | 4.26E-06 |
| Death Receptor Signalling                                                                   | 12    | 0.552    | 7    | 2.64E-07 | 6.37E-06 |
| Extrinsic Pathway for Apoptosis                                                             | 12    | 0.552    | 7    | 2.64E-07 | 6.37E-06 |
| TCR signaling                                                                               | 65    | 2.99     | 14   | 1.02E-06 | 2.43E-05 |
| Interleukin-6 signaling                                                                     | 14    | 0.644    | 7    | 1.05E-06 | 2.46E-05 |
| Signaling by the B Cell Receptor (BCR)                                                      | 199   | 9.15     | 26   | 1.14E-06 | 2.62E-05 |
| Signal regulatory protein (SIRP) family interactions                                        | 20    | 0.92     | 8    | 1.42E-06 | 3.2E-05  |



**Table S1.  
Continued**

|                                                                                                |      |       |     |          |          |
|------------------------------------------------------------------------------------------------|------|-------|-----|----------|----------|
| EGFR downregulation                                                                            | 27   | 1.24  | 9   | 1.84E-06 | 4.09E-05 |
| Interleukin-3, 5 and GM-CSF signaling                                                          | 51   | 2.34  | 12  | 2.27E-06 | 4.98E-05 |
| Adaptive Immune System                                                                         | 654  | 30.1  | 56  | 2.39E-06 | 5.14E-05 |
| IRAK1 recruits IKK complex upon TLR7/8 or 9 stimulation                                        | 16   | 0.736 | 7   | 3.24E-06 | 6.79E-05 |
| IRAK1 recruits IKK complex                                                                     | 16   | 0.736 | 7   | 3.24E-06 | 6.79E-05 |
| Common Pathway                                                                                 | 11   | 0.506 | 6   | 3.42E-06 | 7.05E-05 |
| Intrinsic Pathway                                                                              | 17   | 0.782 | 7   | 5.3E-06  | 0.000108 |
| Activation of NF-kappaB in B Cells                                                             | 66   | 3.03  | 13  | 7.19E-06 | 0.000144 |
| Signal Transduction                                                                            | 1690 | 77.6  | 111 | 9.75E-06 | 0.000193 |
| NF-kB is activated and signals survival                                                        | 13   | 0.598 | 6   | 1.17E-05 | 0.000226 |
| p75NTR recruits signalling complexes                                                           | 13   | 0.598 | 6   | 1.17E-05 | 0.000226 |
| Interleukin-2 signaling                                                                        | 42   | 1.93  | 10  | 1.44E-05 | 0.000274 |
| Signal transduction by L1                                                                      | 35   | 1.61  | 9   | 2E-05    | 0.000374 |
| Peptide ligand-binding receptors                                                               | 192  | 8.83  | 23  | 2.07E-05 | 0.000382 |
| CaMK IV-mediated phosphorylation of CREB                                                       | 5    | 0.23  | 4   | 2.11E-05 | 0.000382 |
| Dimerization of procaspase-8                                                                   | 9    | 0.414 | 5   | 2.15E-05 | 0.000382 |
| Caspase-8 activation                                                                           | 9    | 0.414 | 5   | 2.15E-05 | 0.000382 |
| Signalling by NGF                                                                              | 290  | 13.3  | 30  | 2.19E-05 | 0.000383 |
| Interleukin receptor SHC signaling                                                             | 28   | 1.29  | 8   | 2.53E-05 | 0.000438 |
| Developmental Biology                                                                          | 417  | 19.2  | 38  | 3.2E-05  | 0.000546 |
| Downstream Signaling Events Of B Cell Receptor (BCR)                                           | 173  | 7.95  | 21  | 3.92E-05 | 0.000662 |
| Interferon alpha/beta signaling                                                                | 68   | 3.13  | 12  | 5.16E-05 | 0.00086  |
| Activation of Matrix Metalloproteinases                                                        | 31   | 1.43  | 8   | 5.69E-05 | 0.000938 |
| CREB phosphorylation through the activation of CaMKK                                           | 6    | 0.276 | 4   | 6.11E-05 | 0.000996 |
| TRAF6 mediated IRF7 activation in TLR7/8 or 9 signaling                                        | 17   | 0.782 | 6   | 7.24E-05 | 0.00117  |
| Apoptosis                                                                                      | 158  | 7.26  | 19  | 0.000104 | 0.00166  |
| Interleukin-7 signaling                                                                        | 12   | 0.552 | 5   | 0.000121 | 0.00187  |
| NF-kB activation through FADD/RIP-1 pathway mediated by caspase-8 and -10                      | 12   | 0.552 | 5   | 0.000121 | 0.00187  |
| Interferon gamma signaling                                                                     | 74   | 3.4   | 12  | 0.000121 | 0.00187  |
| Signaling by PDGF                                                                              | 189  | 8.69  | 21  | 0.000143 | 0.00218  |
| PECAM1 interactions                                                                            | 13   | 0.598 | 5   | 0.000189 | 0.00284  |
| Signaling by EGFR                                                                              | 179  | 8.23  | 20  | 0.000191 | 0.00285  |
| SMAD2/SMAD3:SMAD4 heterotrimer regulates transcription                                         | 28   | 1.29  | 7   | 0.000208 | 0.00307  |
| Signaling by EGFR in Cancer                                                                    | 181  | 8.32  | 20  | 0.000222 | 0.00325  |
| Regulation of Insulin-like Growth Factor (IGF) Transport and Uptake by Insulin-like Growth Fac | 21   | 0.966 | 6   | 0.000272 | 0.00393  |
| TRAF3-dependent IRF activation pathway                                                         | 14   | 0.644 | 5   | 0.000283 | 0.00404  |
| Signaling by TGF-beta Receptor Complex                                                         | 70   | 3.22  | 11  | 0.000309 | 0.00437  |
| MAPK targets/ Nuclear events mediated by MAP kinases                                           | 30   | 1.38  | 7   | 0.000331 | 0.00464  |
| Activation of CaMK IV                                                                          | 4    | 0.184 | 3   | 0.000372 | 0.00516  |
| NOTCH1 Intracellular Domain Regulates Transcription                                            | 50   | 2.3   | 9   | 0.000386 | 0.00531  |
| eNOS activation                                                                                | 9    | 0.414 | 4   | 0.00046  | 0.00626  |
| Activation of the pre-replicative complex                                                      | 32   | 1.47  | 7   | 0.000505 | 0.00675  |
| Antigen Activates B Cell Receptor Leading to Generation of Second Messengers                   | 32   | 1.47  | 7   | 0.000505 | 0.00675  |
| Assembly of the pre-replicative complex                                                        | 63   | 2.9   | 10  | 0.000532 | 0.00703  |
| Signaling by ERBB4                                                                             | 152  | 6.99  | 17  | 0.000569 | 0.0074   |
| L1CAM interactions                                                                             | 112  | 5.15  | 14  | 0.00057  | 0.0074   |
| GPVI-mediated activation cascade                                                               | 33   | 1.52  | 7   | 0.000616 | 0.00793  |
| Regulation of mRNA Stability by Proteins that Bind AU-rich Elements                            | 88   | 4.05  | 12  | 0.000637 | 0.00812  |
| Transcriptional activity of SMAD2/SMAD3:SMAD4 heterotrimer                                     | 43   | 1.98  | 8   | 0.000646 | 0.00816  |
| Activation of the AP-1 family of transcription factors                                         | 10   | 0.46  | 4   | 0.000738 | 0.00916  |
| GP1b-IX-V activation signalling                                                                | 10   | 0.46  | 4   | 0.000738 | 0.00916  |
| Signaling by SCF-KIT                                                                           | 142  | 6.53  | 16  | 0.000758 | 0.00932  |
| Regulation of IFNG signaling                                                                   | 17   | 0.782 | 5   | 0.000779 | 0.0095   |
| Extracellular matrix organization                                                              | 157  | 7.22  | 17  | 0.000826 | 0.00998  |
| Activation of Chaperone Genes by ATF6-alpha                                                    | 5    | 0.23  | 3   | 0.000898 | 0.0108   |
| DNA Replication Pre-Initiation                                                                 | 80   | 3.68  | 11  | 0.000993 | 0.0117   |
| M/G1 Transition                                                                                | 80   | 3.68  | 11  | 0.000993 | 0.0117   |
| Switching of origins to a post-replicative state                                               | 69   | 3.17  | 10  | 0.00111  | 0.0127   |
